# Supplementary material for: Nitrate directed organized assemblies of protonated arene based tripodal receptors
Source: Royal Society of Chemistry journal article supplement (doi:10.1039/b919950k), 2010-01-01
Supplement: b919950k.pdf [file b919950k.pdf]

## Supporting Information

# Nitrate directed organized assemblies of protonated arene based tripodal receptors

M. Arunachalam and Pradyut Ghosh\*

*Department of Inorganic Chemistry, Indian Association for the Cultivation of Science,*

*2A & 2B Raja S. C. Mullick Road, Kolkata 700032, India.*

*E-mail: [icpg@iacs.res.in](mailto:icpg@iacs.res.in)*

## Contents

## Page No.

|     |                                                                                          |    |
|-----|------------------------------------------------------------------------------------------|----|
| 1.  | <sup>1</sup> H-NMR spectra of Complex 3 in DMSO- <i>d</i> <sub>6</sub> at 25°C.....      | 1  |
| 2.  | HRMS (ESI) spectra of Complex 3.....                                                     | 2  |
| 3.  | TGA curve for Complex 3 showing 1.5 H <sub>2</sub> O loss.....                           | 3  |
| 4.  | <sup>1</sup> H-NMR spectra of complex 4 in DMSO- <i>d</i> <sub>6</sub> at 25°C.....      | 4  |
| 5.  | <sup>13</sup> C-NMR spectra of complex 4 in DMSO- <i>d</i> <sub>6</sub> at 25°C.....     | 5  |
| 6.  | HRMS (ESI) spectra of Complex 4.....                                                     | 6  |
| 7.  | <sup>1</sup> H-NMR spectra of complex 5 in DMSO- <i>d</i> <sub>6</sub> at 25°C .....     | 7  |
| 8.  | <sup>13</sup> C-NMR spectra of complex 5 in DMSO- <i>d</i> <sub>6</sub> at 25°C .....    | 8  |
| 9.  | HRMS (ESI) spectra of Complex 5.....                                                     | 9  |
| 10. | <sup>1</sup> H-NMR spectra of complex 6 in D <sub>2</sub> O at 25°C .....                | 10 |
| 11. | <sup>13</sup> C-NMR spectra of complex 6 in D <sub>2</sub> O at 25°C .....               | 11 |
| 12. | Difference map showing the central hydrogen atom of the<br>hydrogen dinitrate anion..... | 12 |
| 13. | A PLUTON plot of the asymmetric unit of compound 5.....                                  | 13 |

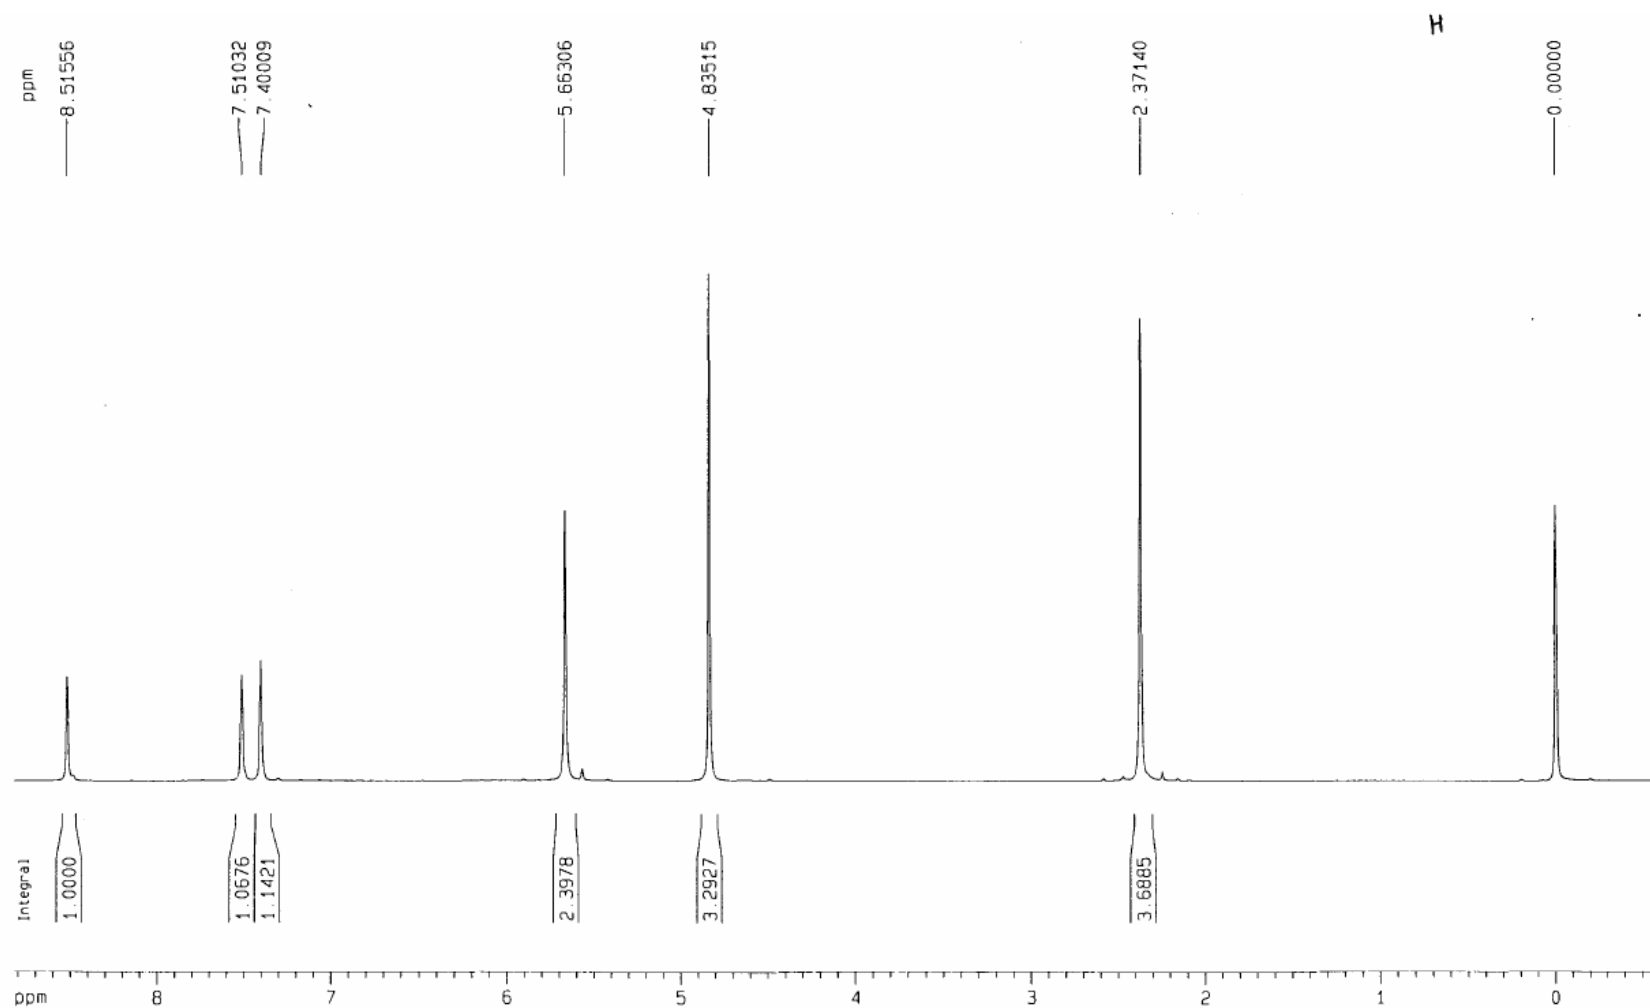

Figure S1.  $^1\text{H}$ -NMR spectra of Complex 3 in  $\text{DMSO}-d_6$  at  $25^\circ\text{C}$ .

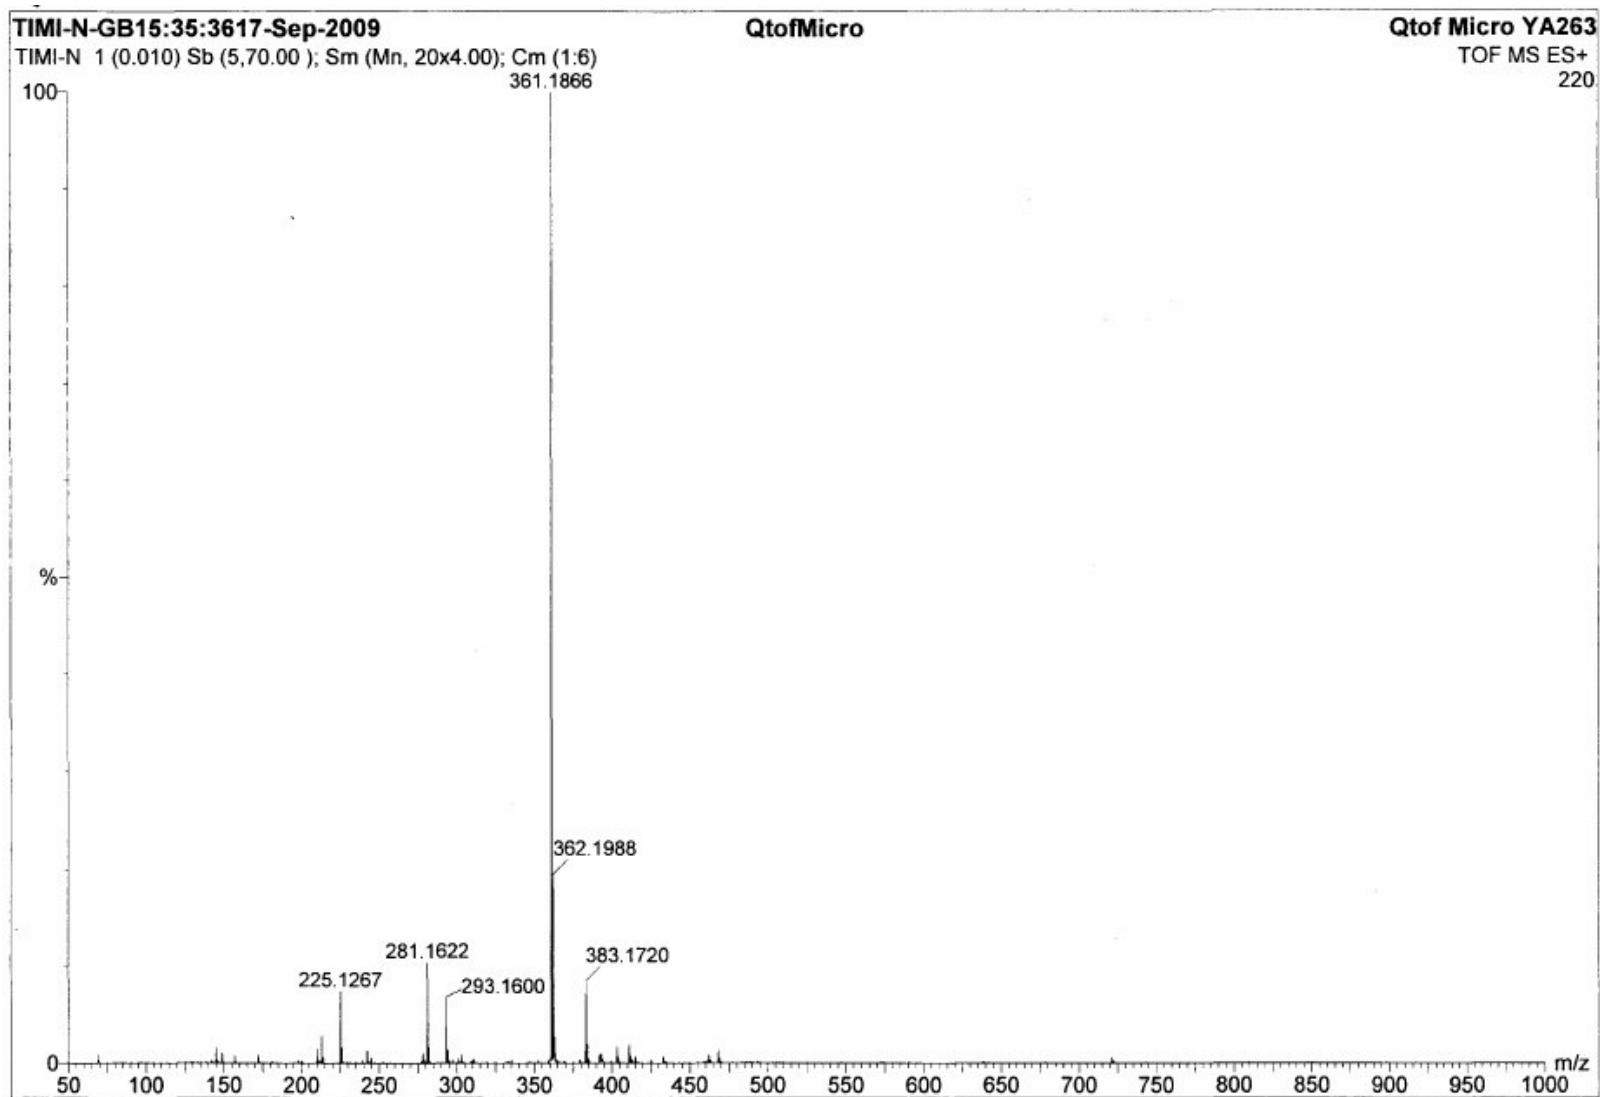

2

**Figure S2. HRMS (ESI) spectra of Complex 3.**

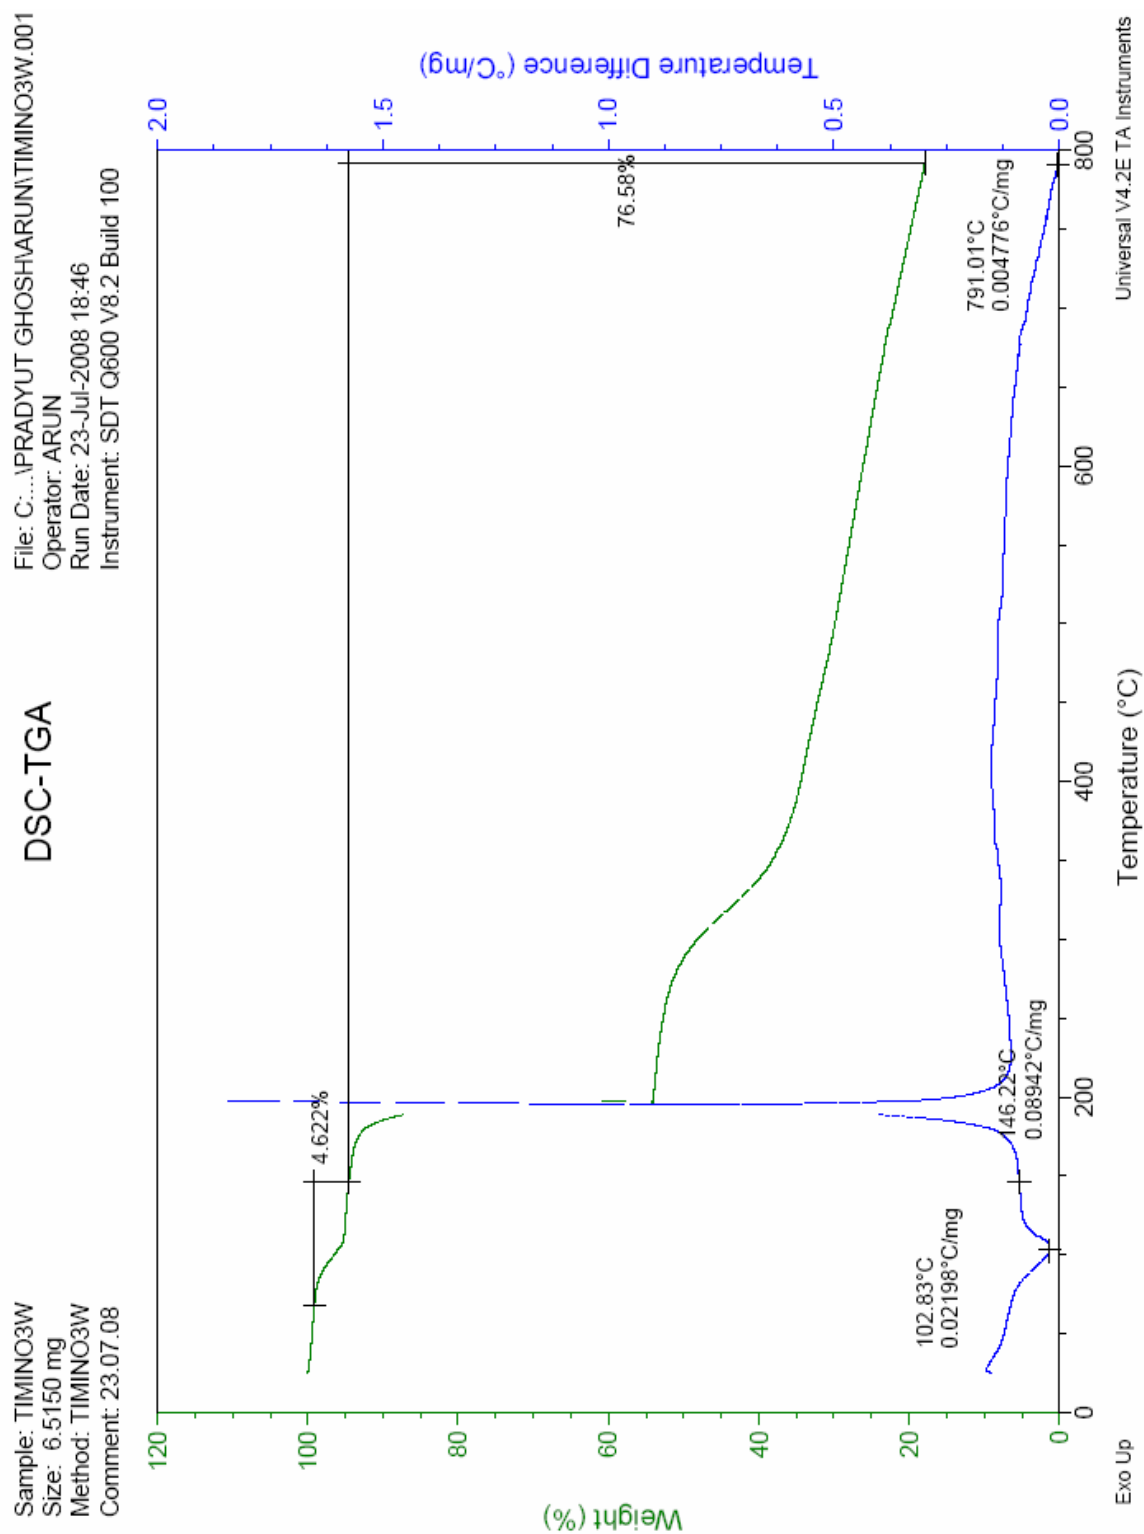

Figure S3. TGA curve for Complex 3 showing 1.5 H<sub>2</sub>O loss.

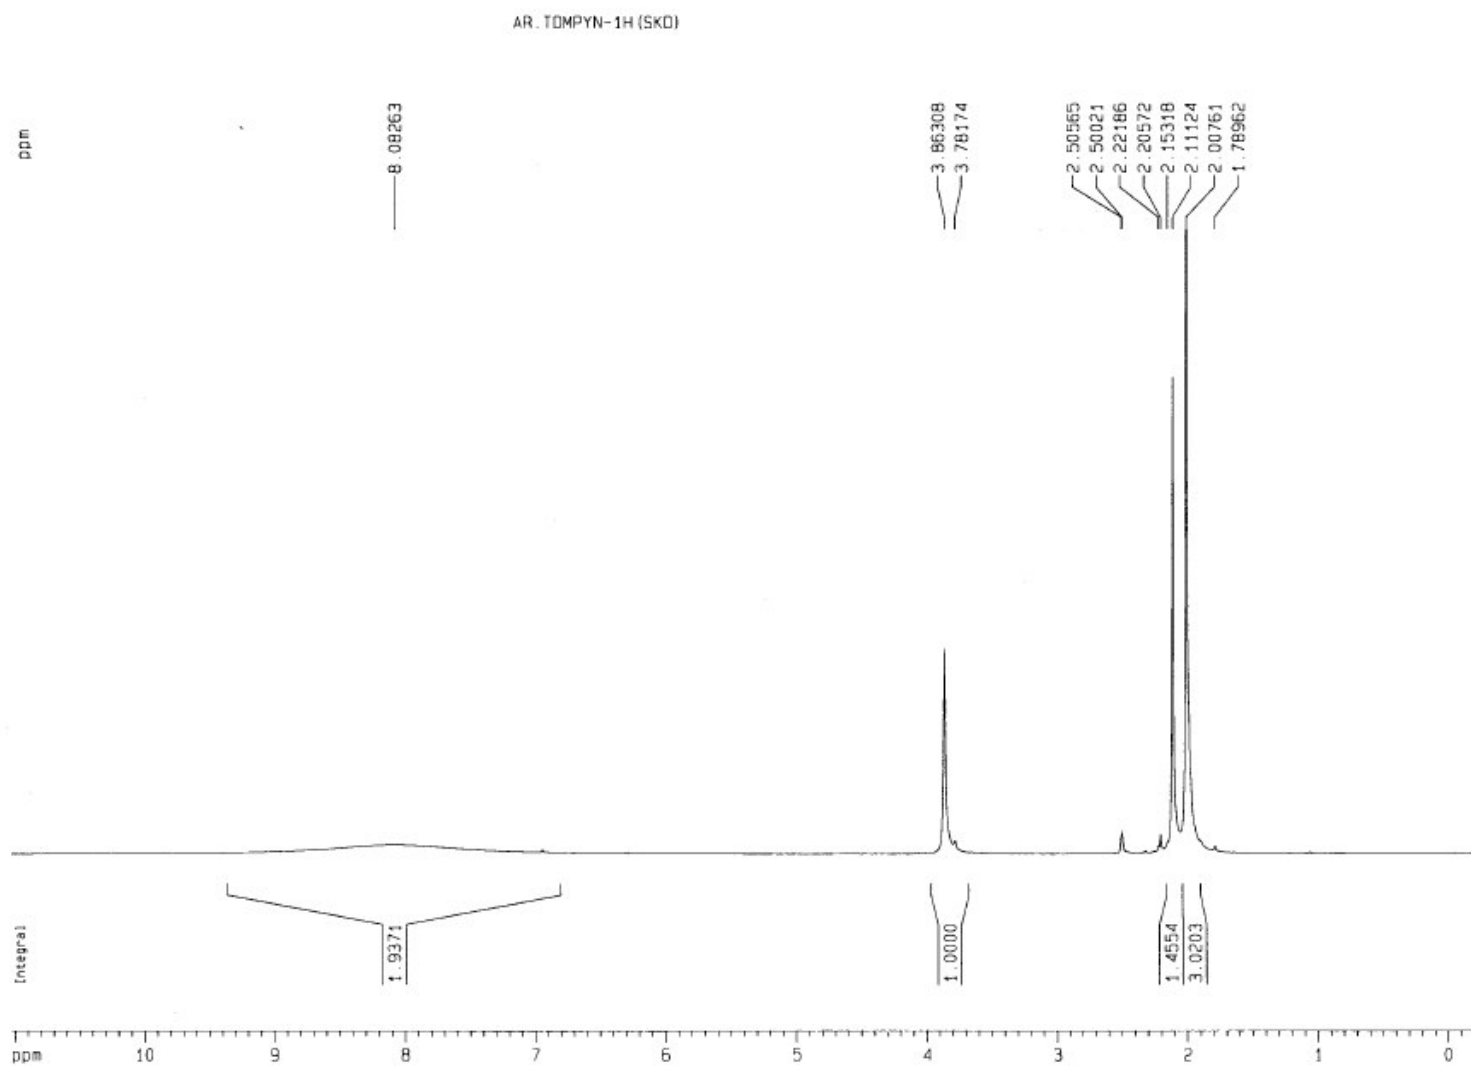

Figure S4.  $^1\text{H}$ -NMR spectra of complex 4 in  $\text{DMSO}-d_6$  at  $25^\circ\text{C}$

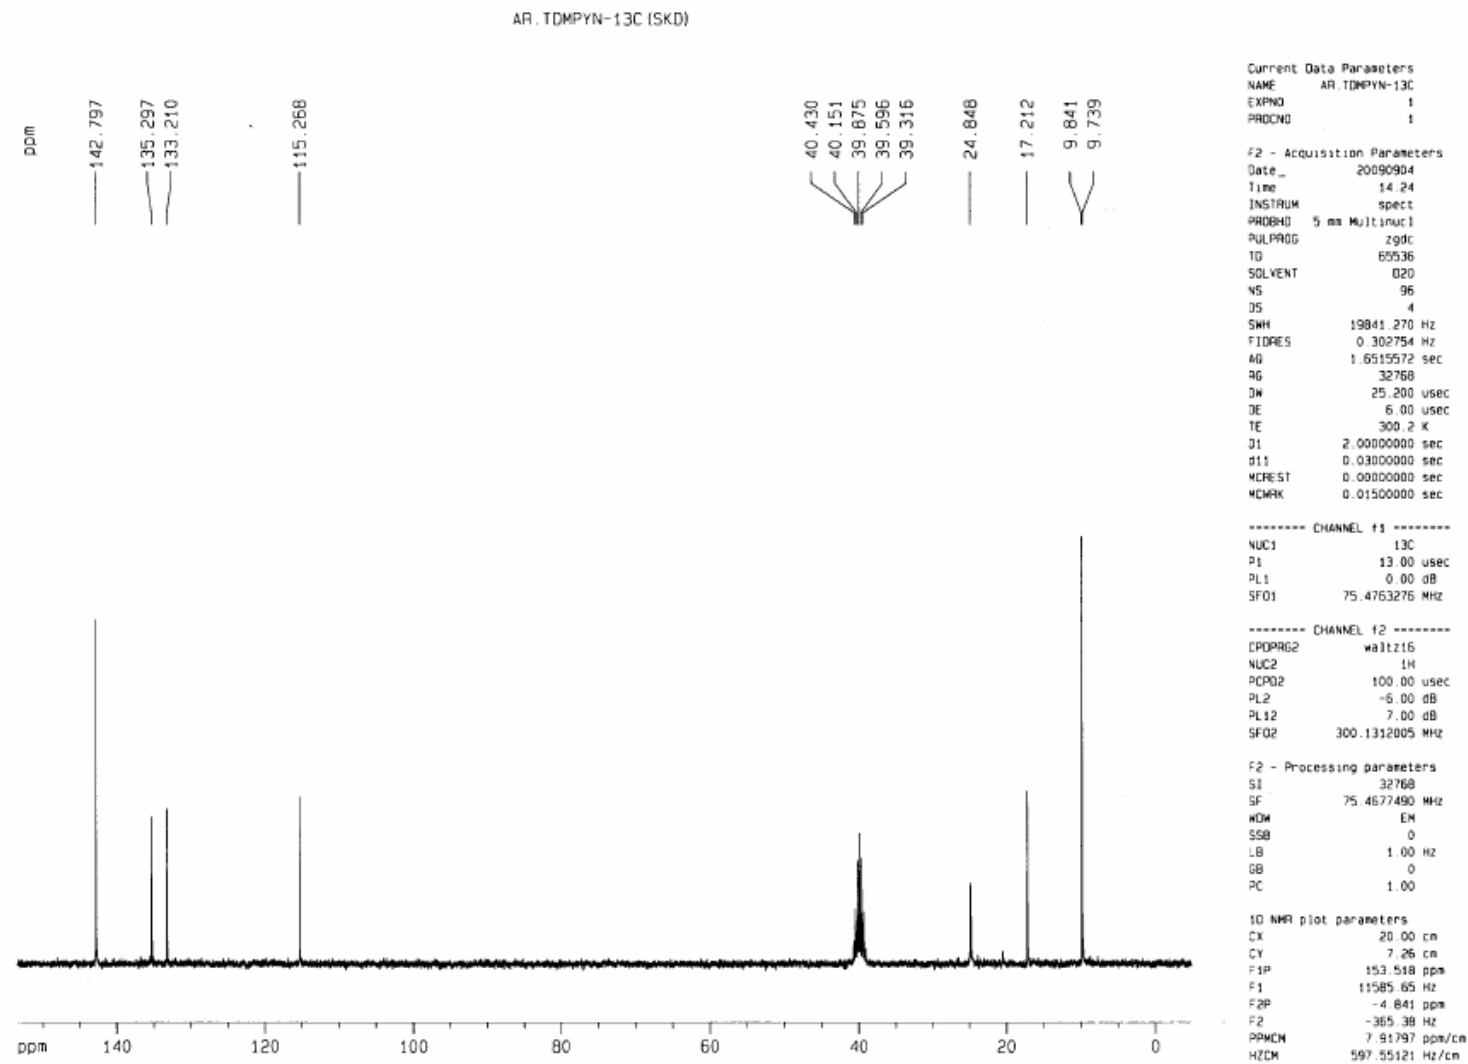

Figure S5.  $^{13}\text{C}$ -NMR spectra of complex 4 in  $\text{DMSO}-d_6$  at  $25^\circ\text{C}$

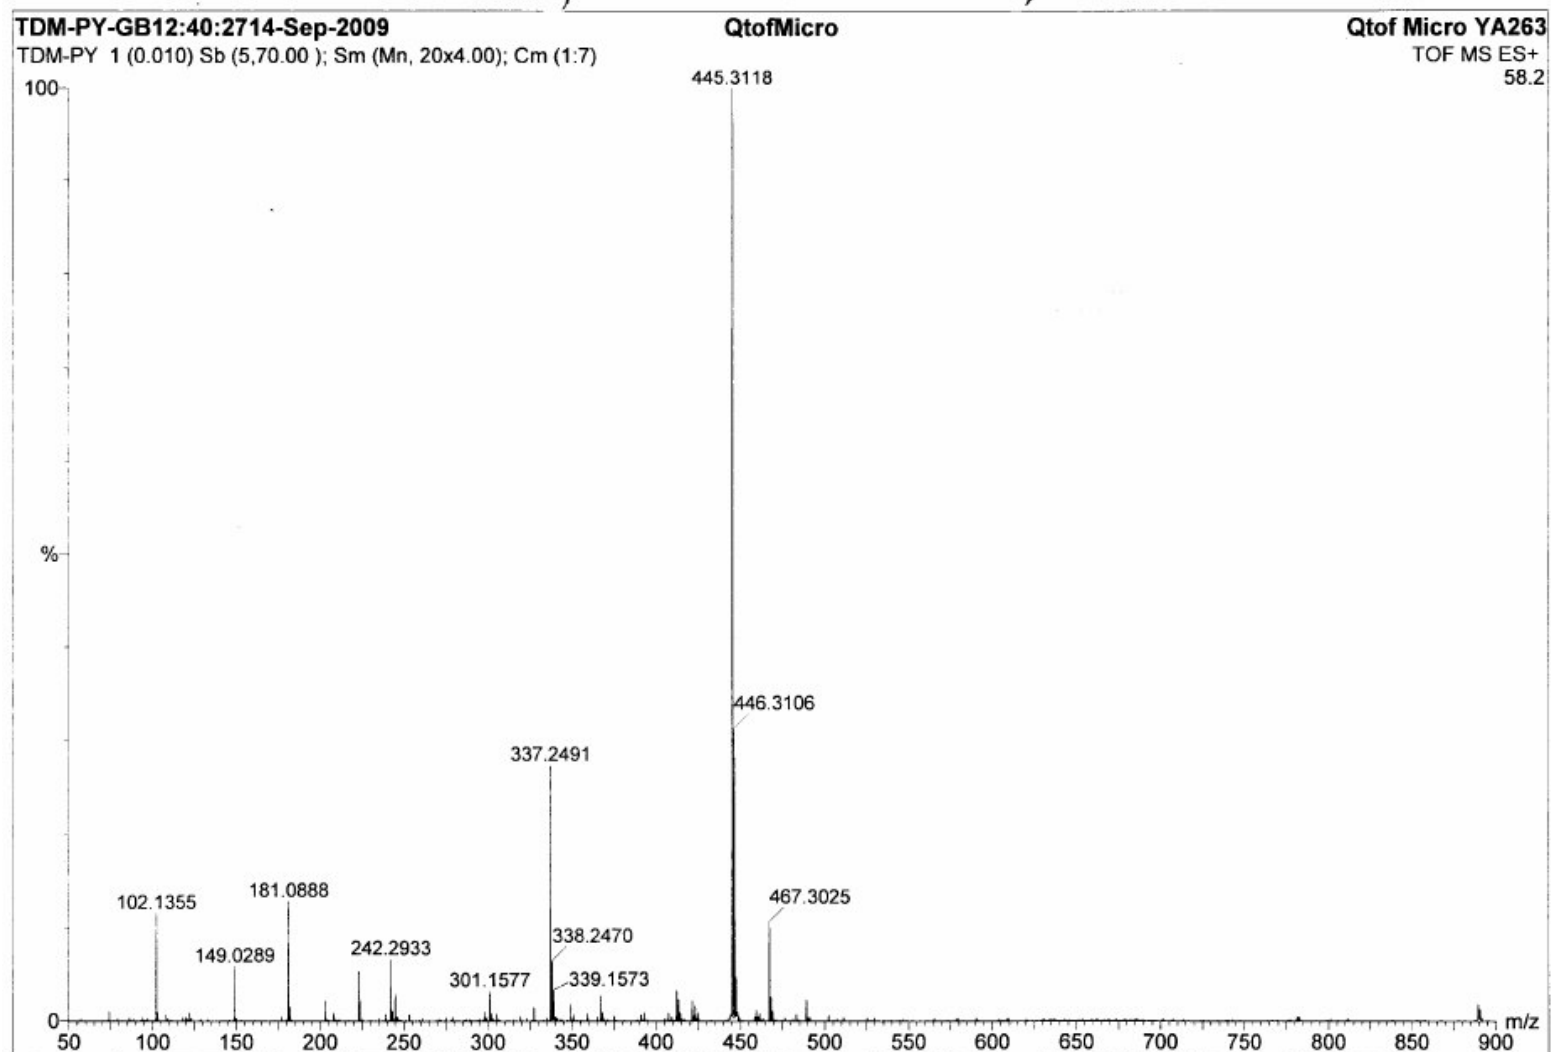

Figure S6. HRMS (ESI) spectra of Complex 4.

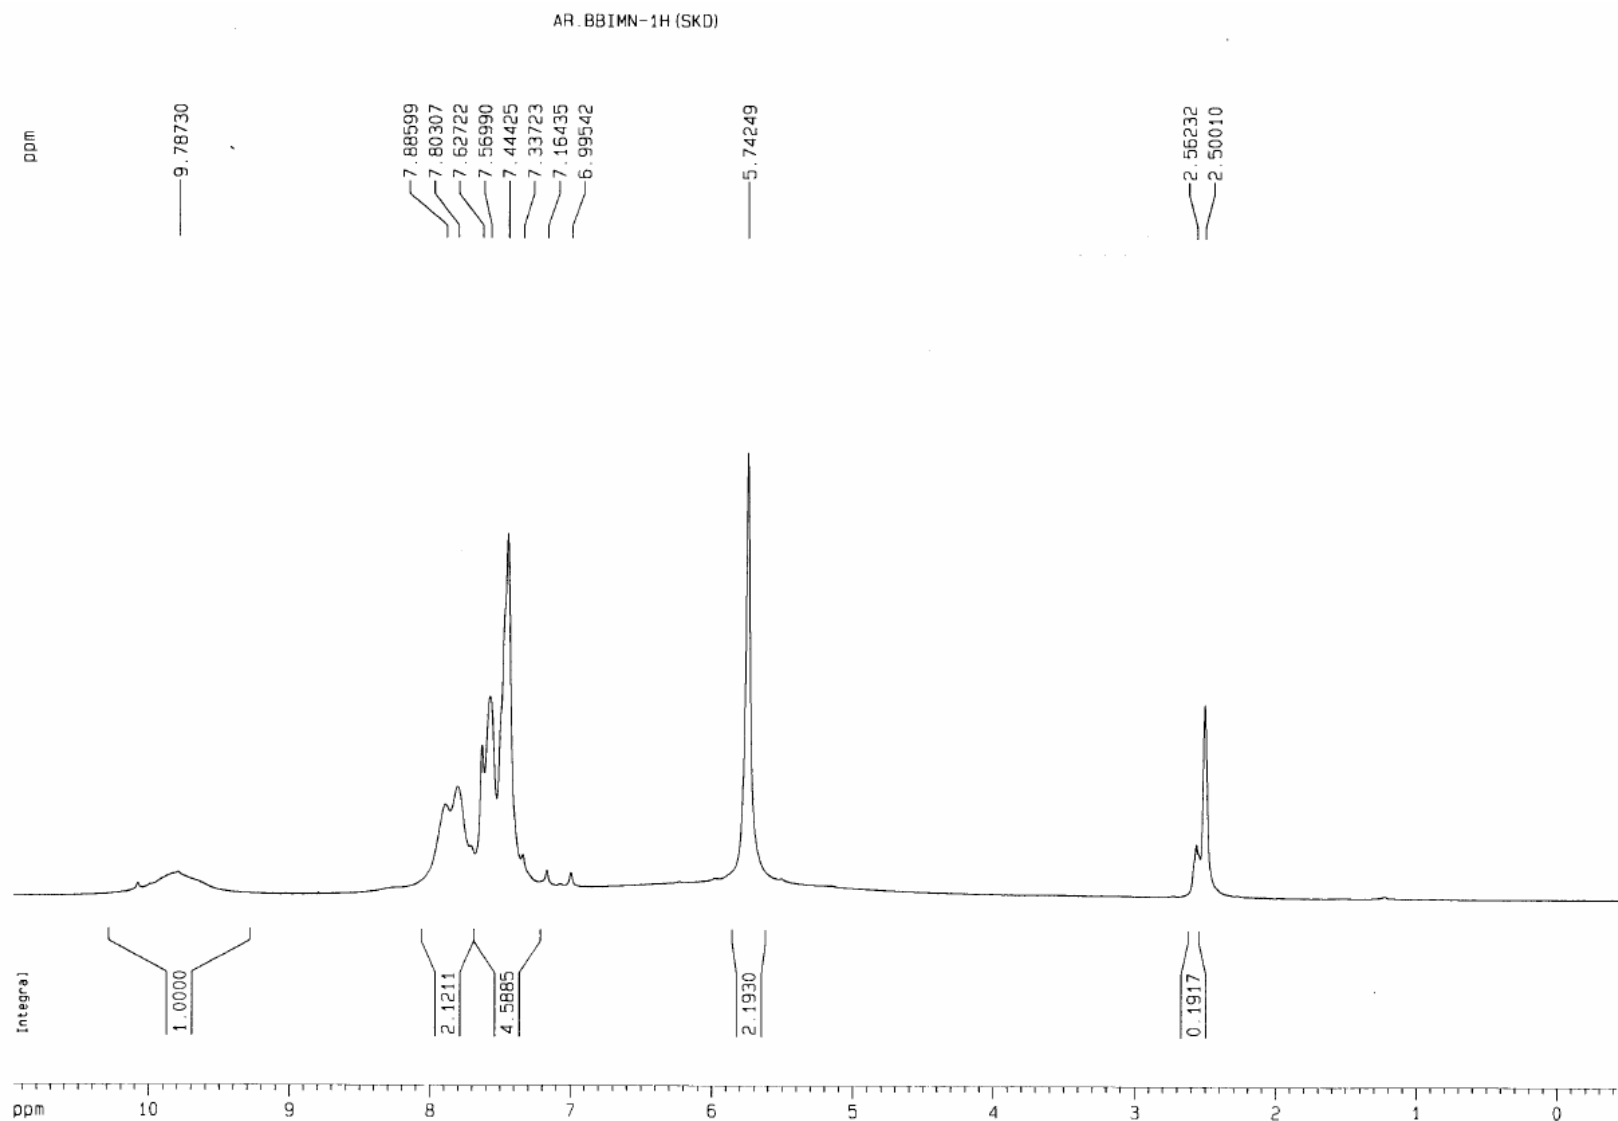

7

Figure S7.  $^1\text{H}$ -NMR spectra of complex 5 in  $\text{DMSO}-d_6$  at  $25^\circ\text{C}$

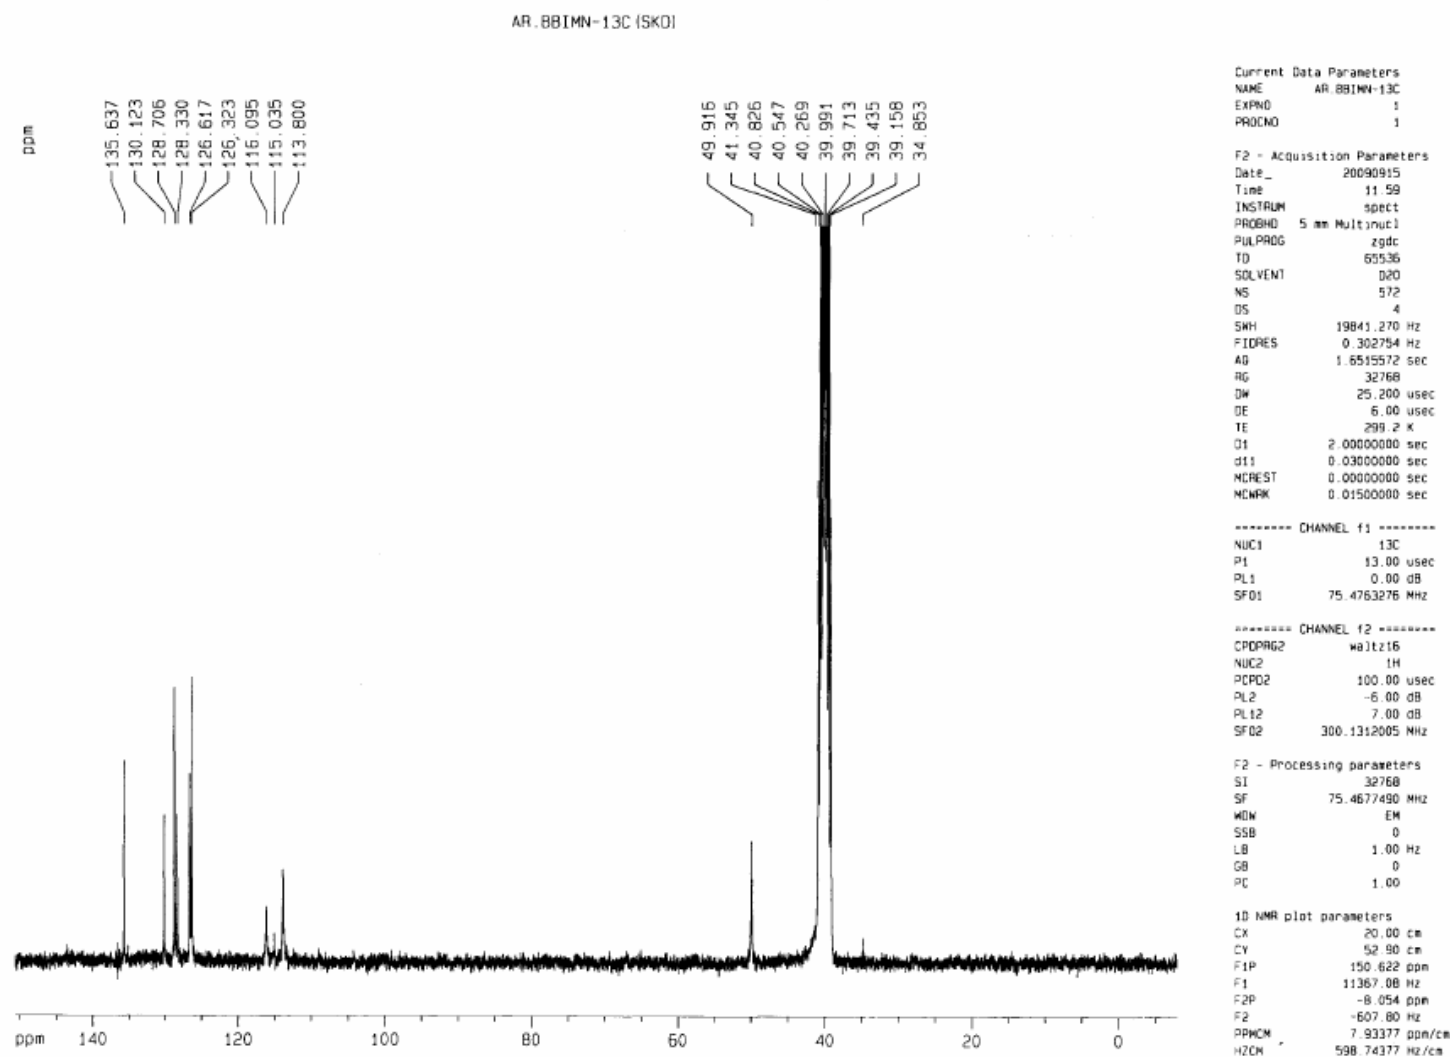

Figure S8.  $^{13}\text{C}$ -NMR spectra of complex 5 in  $\text{DMSO-}d_6$  at  $25^\circ\text{C}$

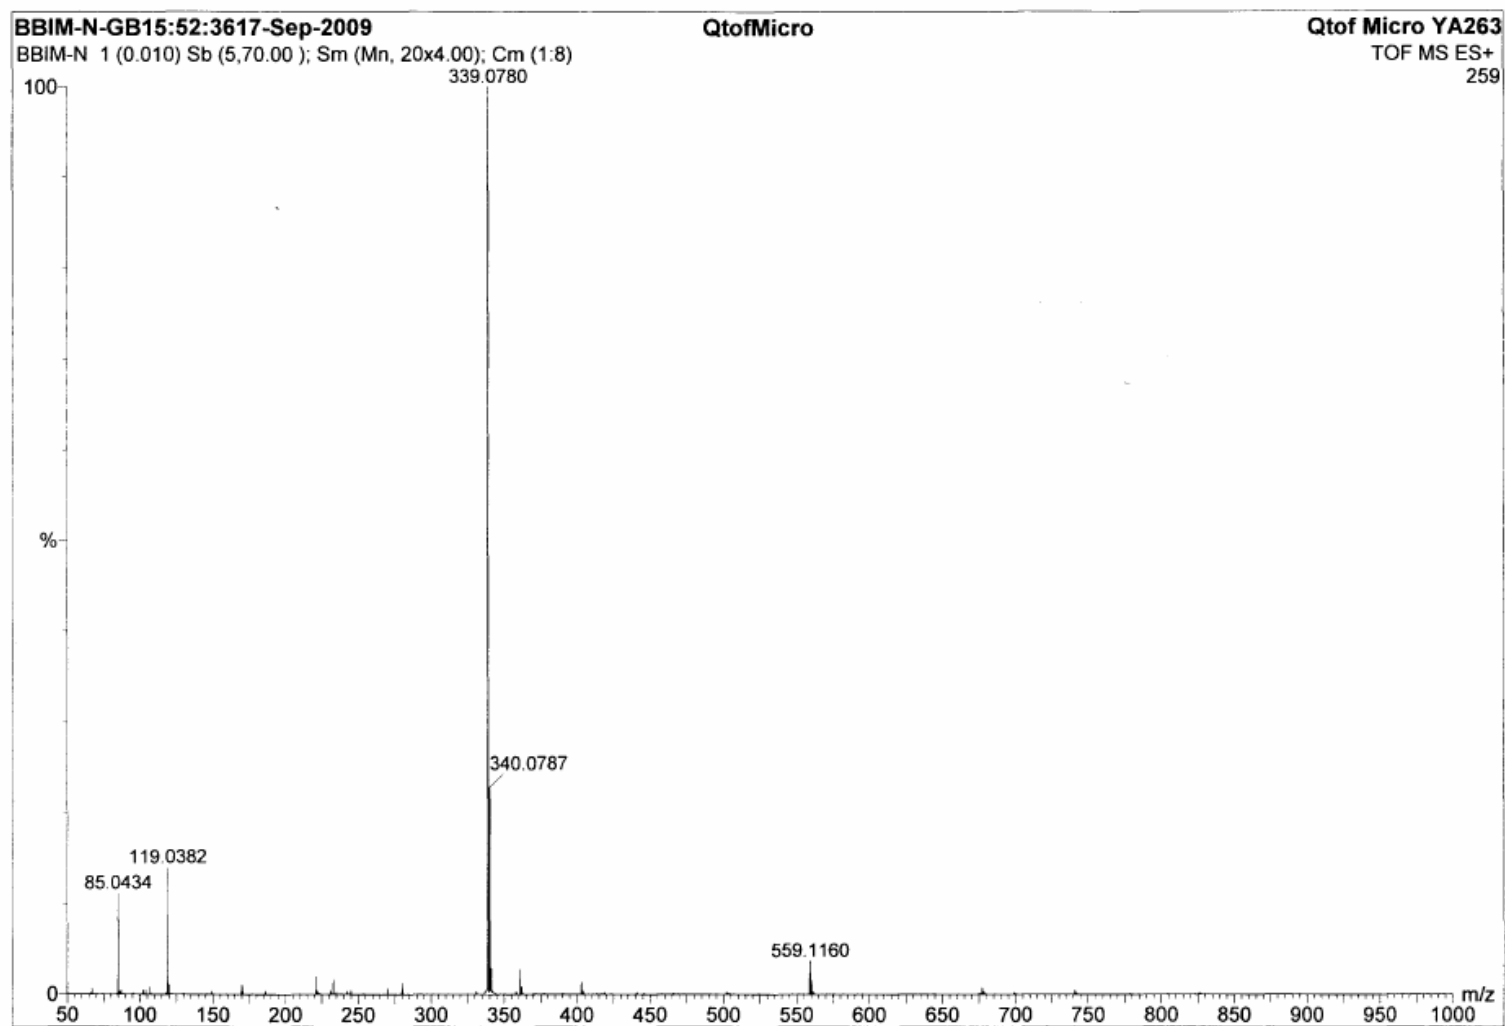

Figure S9. HRMS (ESI) spectra of Complex 5.

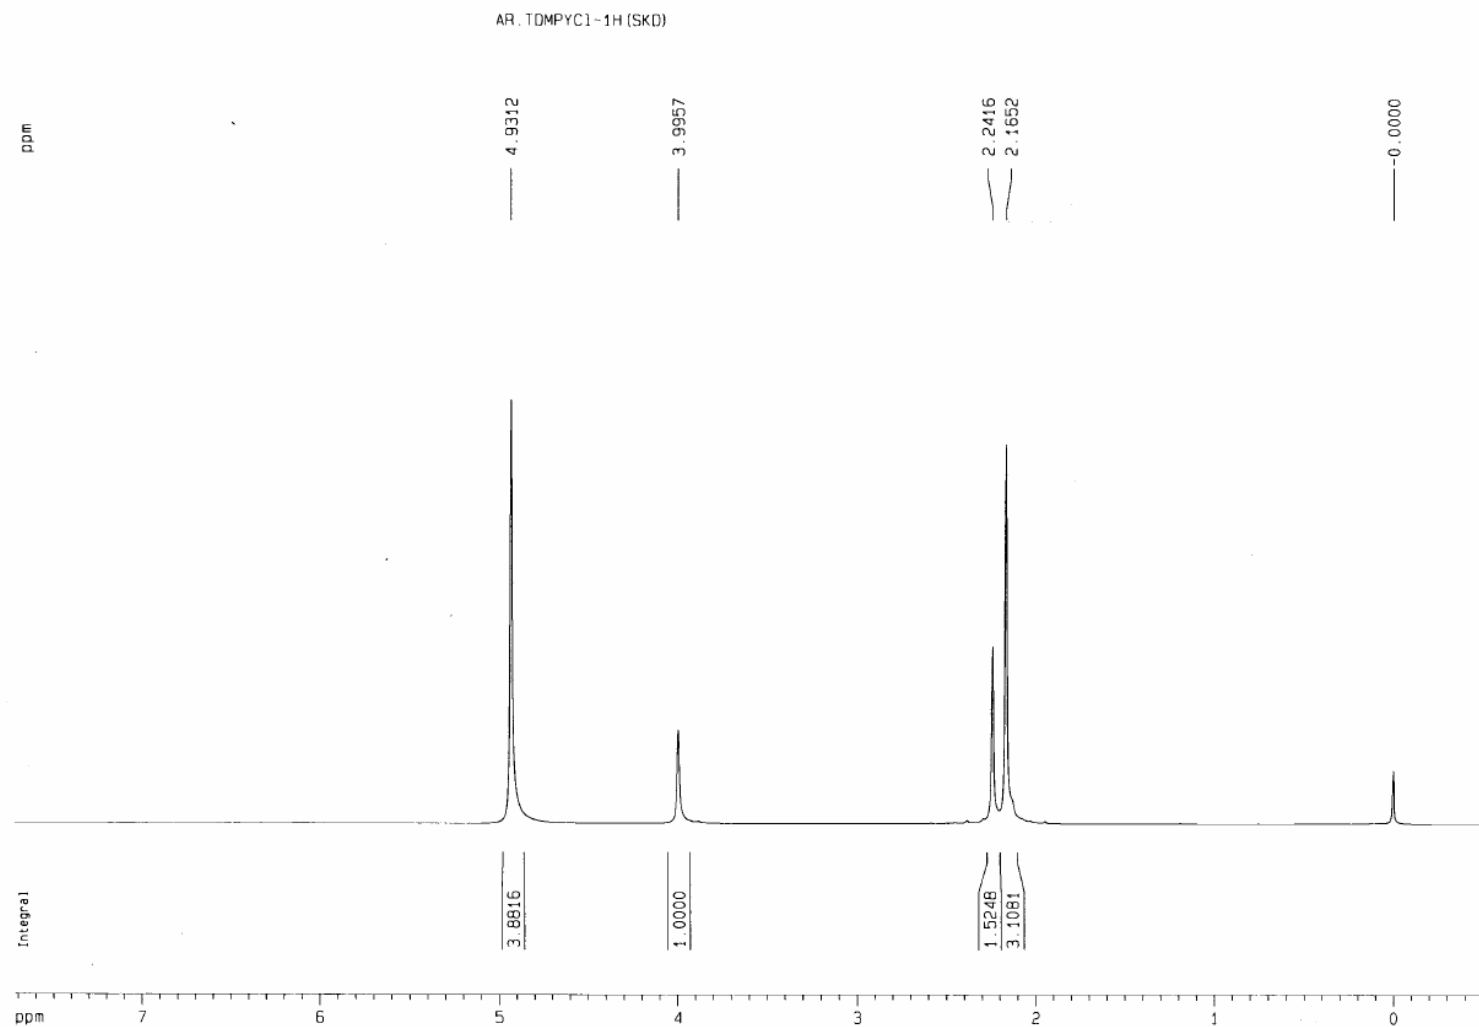

**Figure S10.**  $^1\text{H}$ -NMR spectra of complex 6 in  $\text{D}_2\text{O}$  at  $25^\circ\text{C}$ .

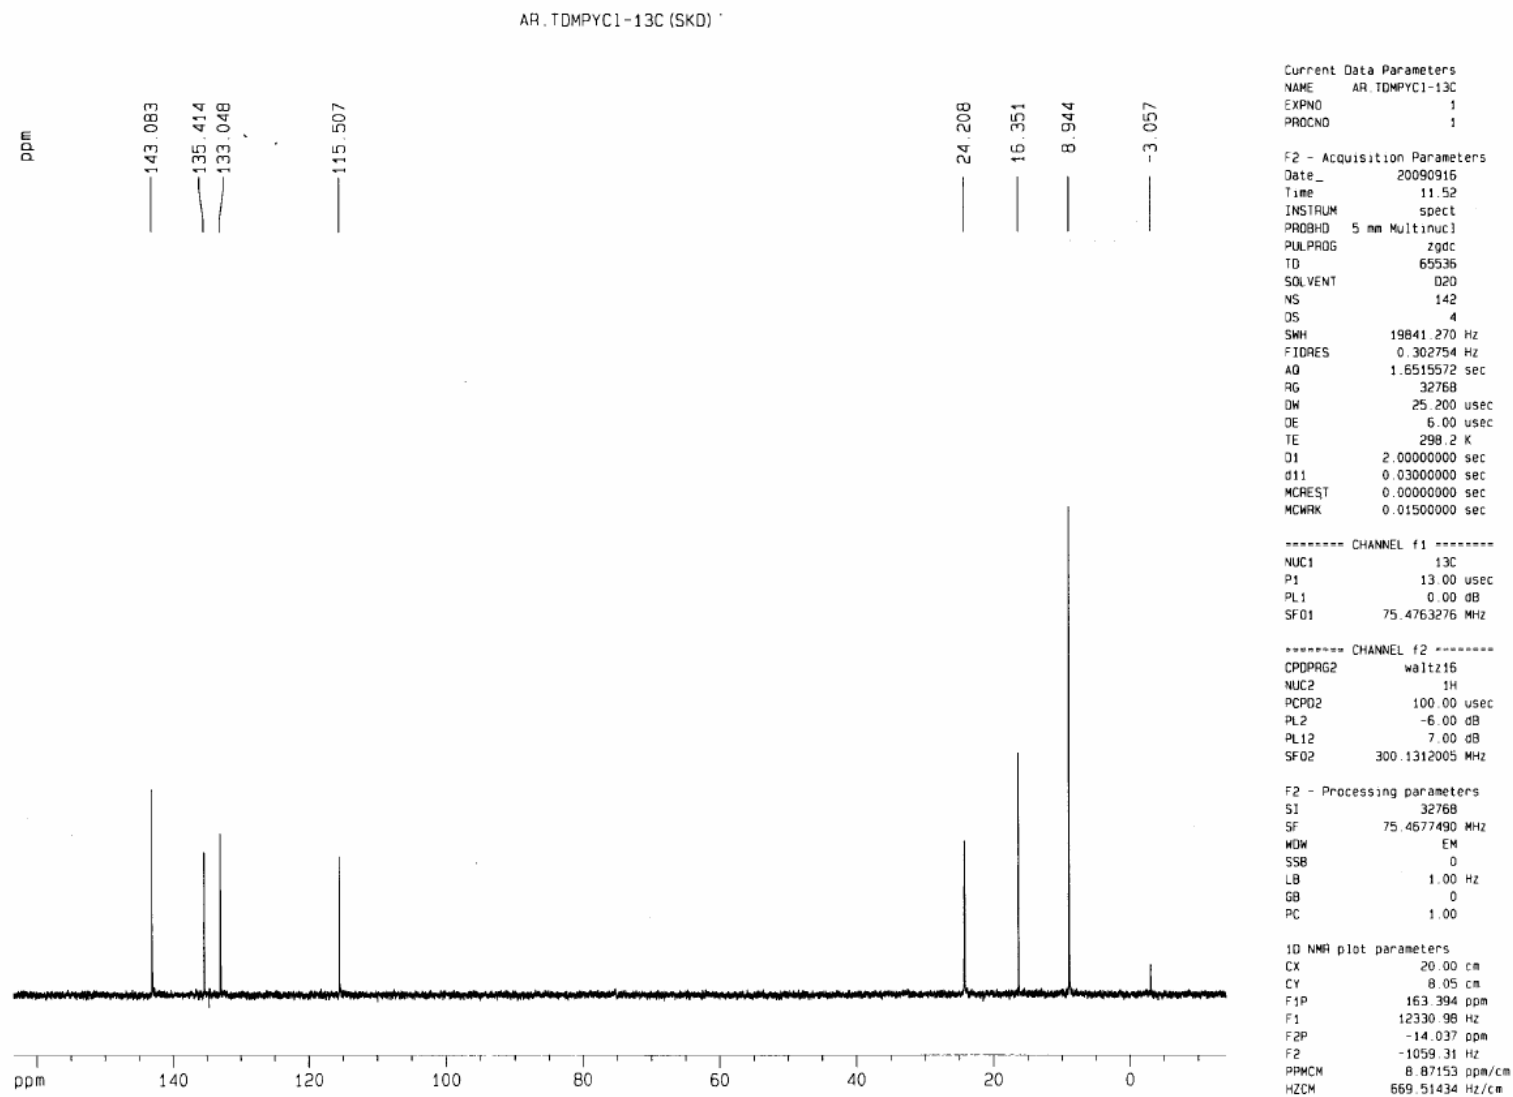

Figure S11.  $^{13}\text{C}$ -NMR spectra of complex 6 in  $\text{D}_2\text{O}$  at  $25^\circ\text{C}$ .

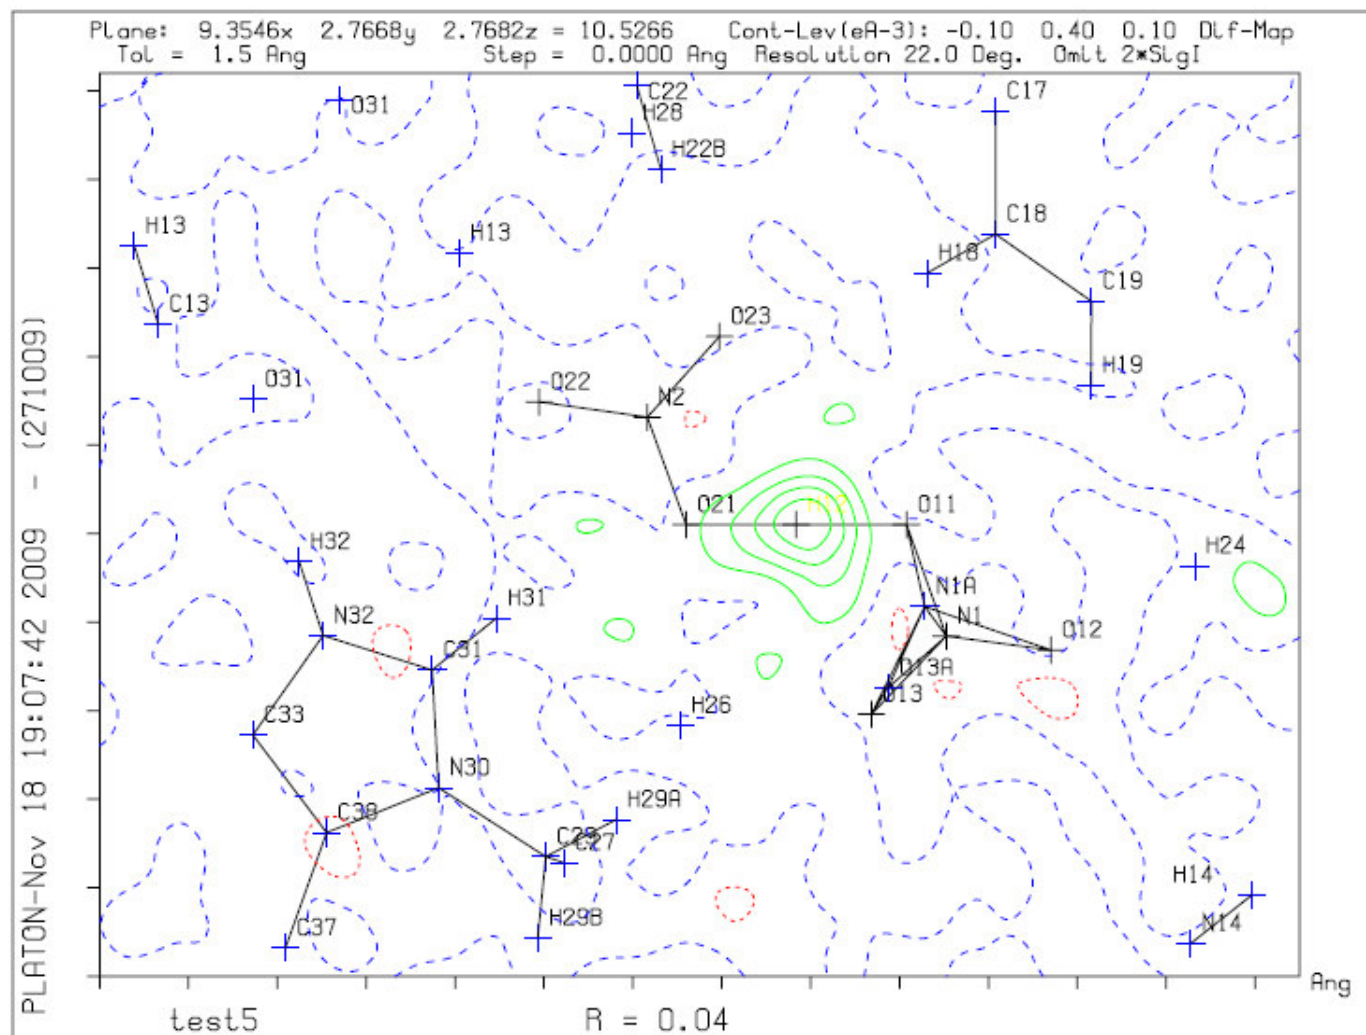

**Figure S12.** Difference map showing the central hydrogen atom of the hydrogen dinitrate anion.

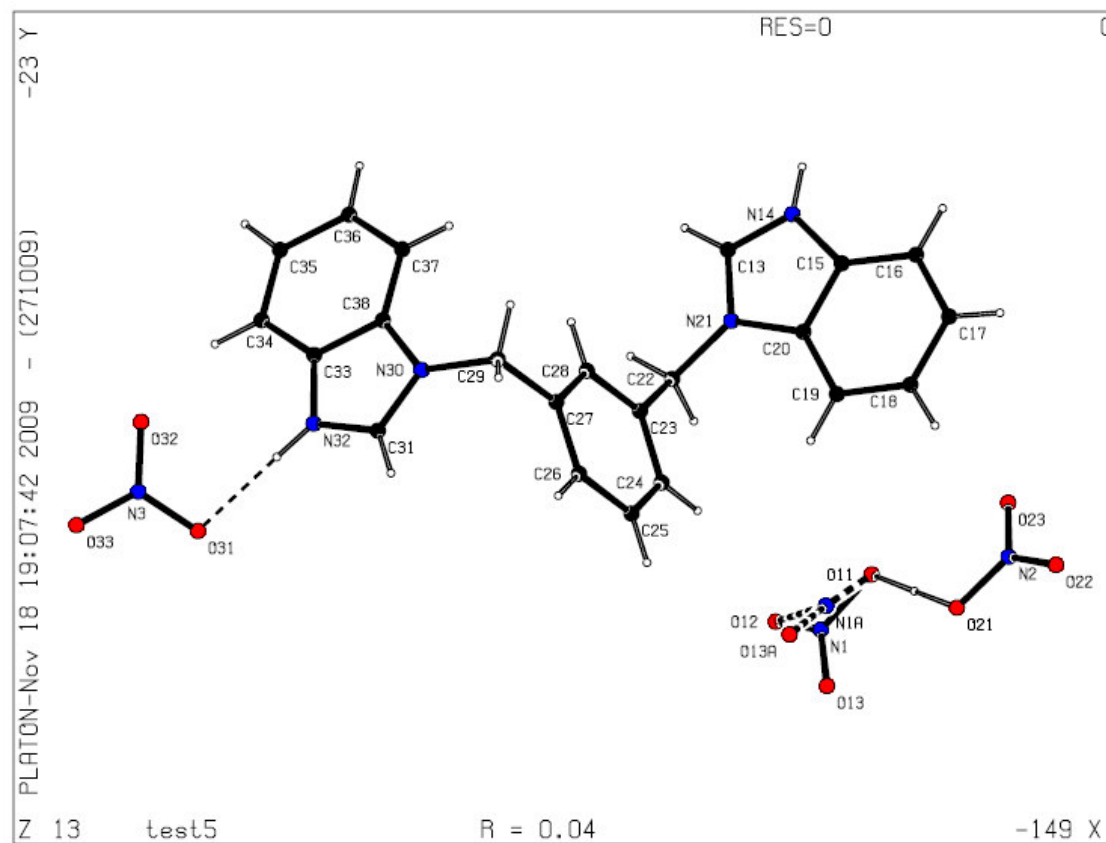

**Figure S13.** A PLUTON plot of the asymmetric unit of compound **5**.
